# Supplementary material for: In Vitro Activation of Seed-Transmitted Cultivation-Recalcitrant Endophytic Bacteria in Tomato and Host–Endophyte Mutualism
Source: MDPI journal article supplement (doi:10.3390/microorganisms7050132), 2019-05-14
Supplement: s1 [file s1]

## Supplementary Materials

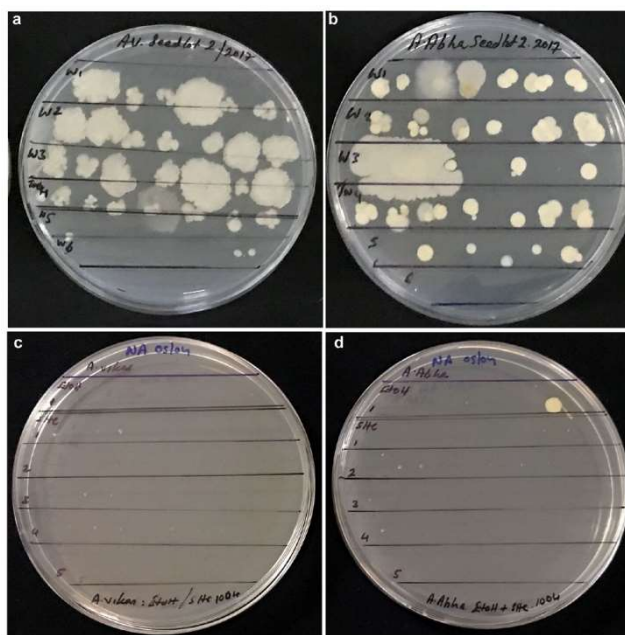

**Figure 1.** Monitoring the tomato seeds for the efficacy of surface sterilization through different steps. (a, b) Seed wash solutions of tomato 'Arka Vikas' and 'Arka Abha' (direct and after Tween-20 step) showing several bacterial colonies on nutrient agar (NA) comprising of *Bacillus* spp./ spore formers, and (c, d) very few or no colonies after ethanol wash or NaOCl treatment.

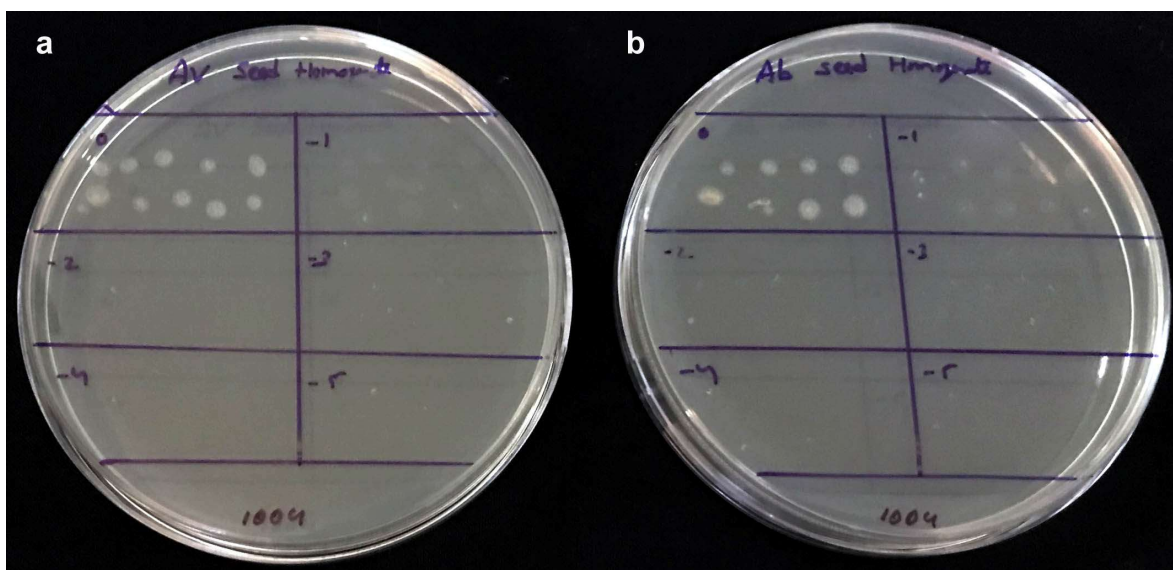

**Figure 2.** Tissue homogenate (100 seeds 10 ml<sup>-1</sup>) from surface-sterilized seeds of tomato 'Arka Vikas' and 'Arka Abha' and the five decimal serial dilutions applied on nutrient agar showing particulate matter at the original homogenate applied spots (10<sup>0</sup>) mimicking colony growth (with no cfu upon its re-streaking or dilution-plating).

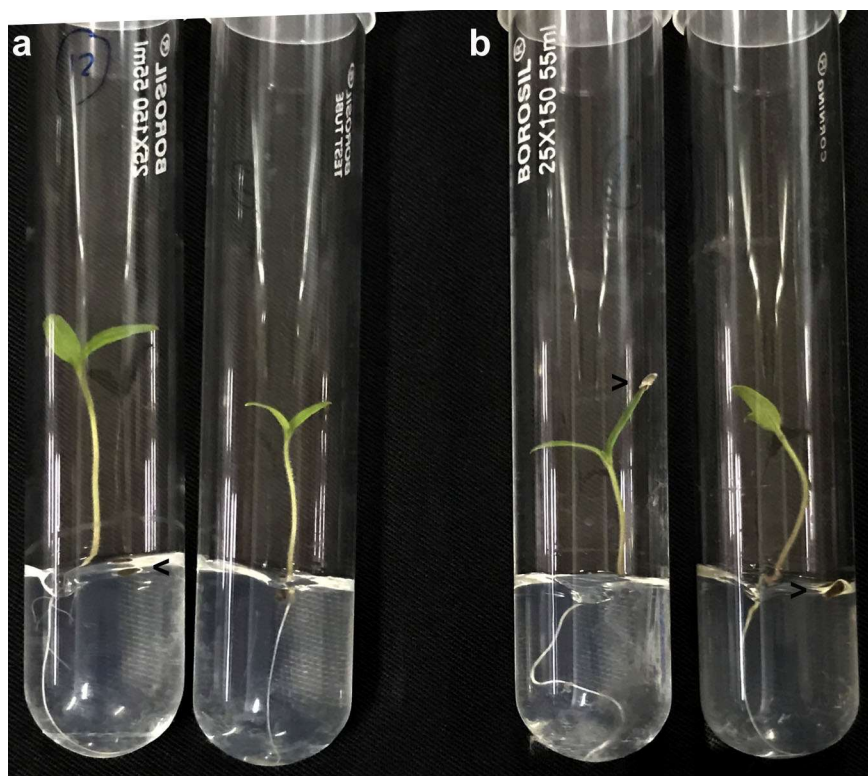

**Figure 3.** Day-10 in vitro grown seedling of tomato 'Arka Vikas' and 'Arka Abha' on sucrose-minus Murashige and Skoog medium [29] showing clear medium devoid of any microbial association and the seed coat (indicated by arrowhead) detached from the seedling base or carried at the distal end of the cotyledon.

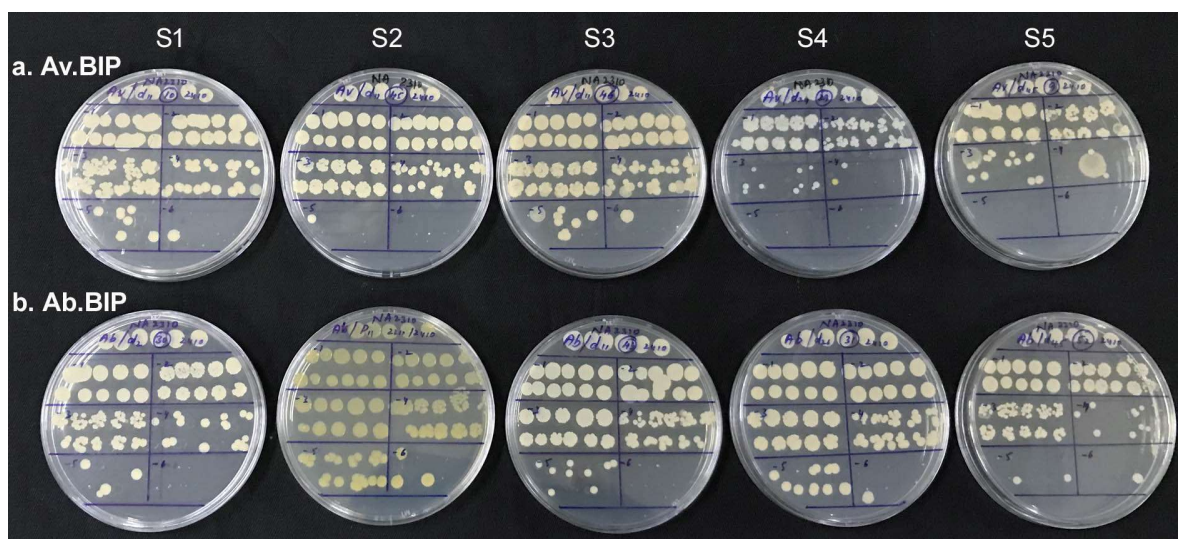

**Figure 4.** SP-SDS on the root tissue homogenate from individual bacteria index-positive 3 weeks old 'Arka Vikas' (Av) and Arka Abha (Ab) seedlings showing the association of a single organism in most cases.

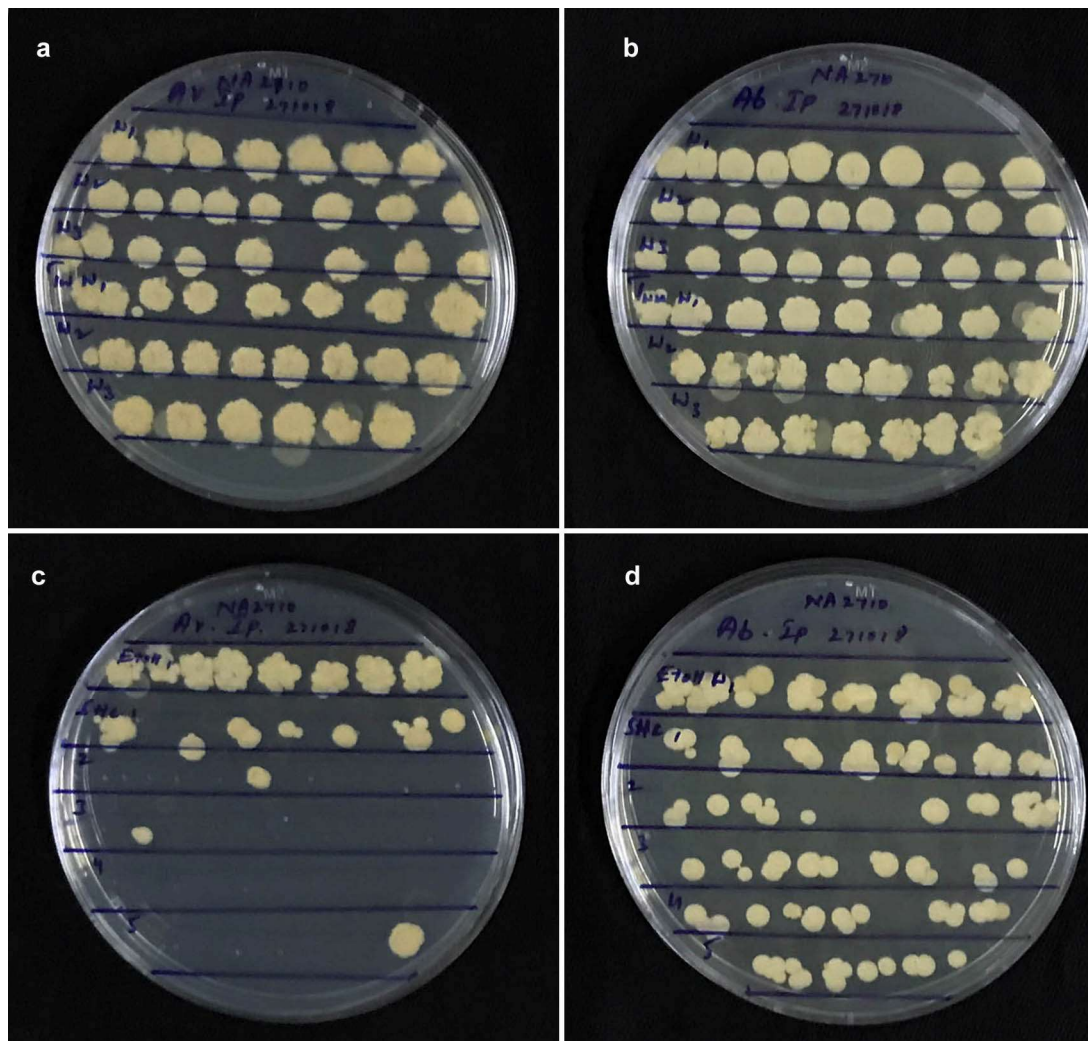

**Figure 5.** A different seed lot of the tomato 'Arka Vikas' and 'Arka Abha' monitored at surface sterilization through seed wash solution spotting on NA (direct and after Tween-20 step) displaying *Bacillus* spp./ spore formers (a, b), and inoculum carry over after ethanol wash or NaOCl treatments (c, d) due to difference in the initial bacterial load, or a reduction in the efficacy of the NaOCl.
